# Supplementary material
Source: ML conference proceedings conference paper supplement (https://openreview.net/forum?id=VqnBaeu43F)
Supplement: supplementary_material [file legend_main_styles.pdf › Compression-Autoencoder/MC_performances/baselines/legend_main_styles.pdf]

.... Small    - - Medium    — Large
