# Supplementary material
Source: ML conference proceedings conference paper supplement (https://openreview.net/forum?id=VqnBaeu43F)

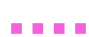

Small

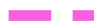

Medium

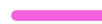

Large

Supplement: supplementary_material [file legend_pgpe_architectures.pdf › Compression-Autoencoder/MC_performances/baselines/legend_pgpe_architectures.pdf]

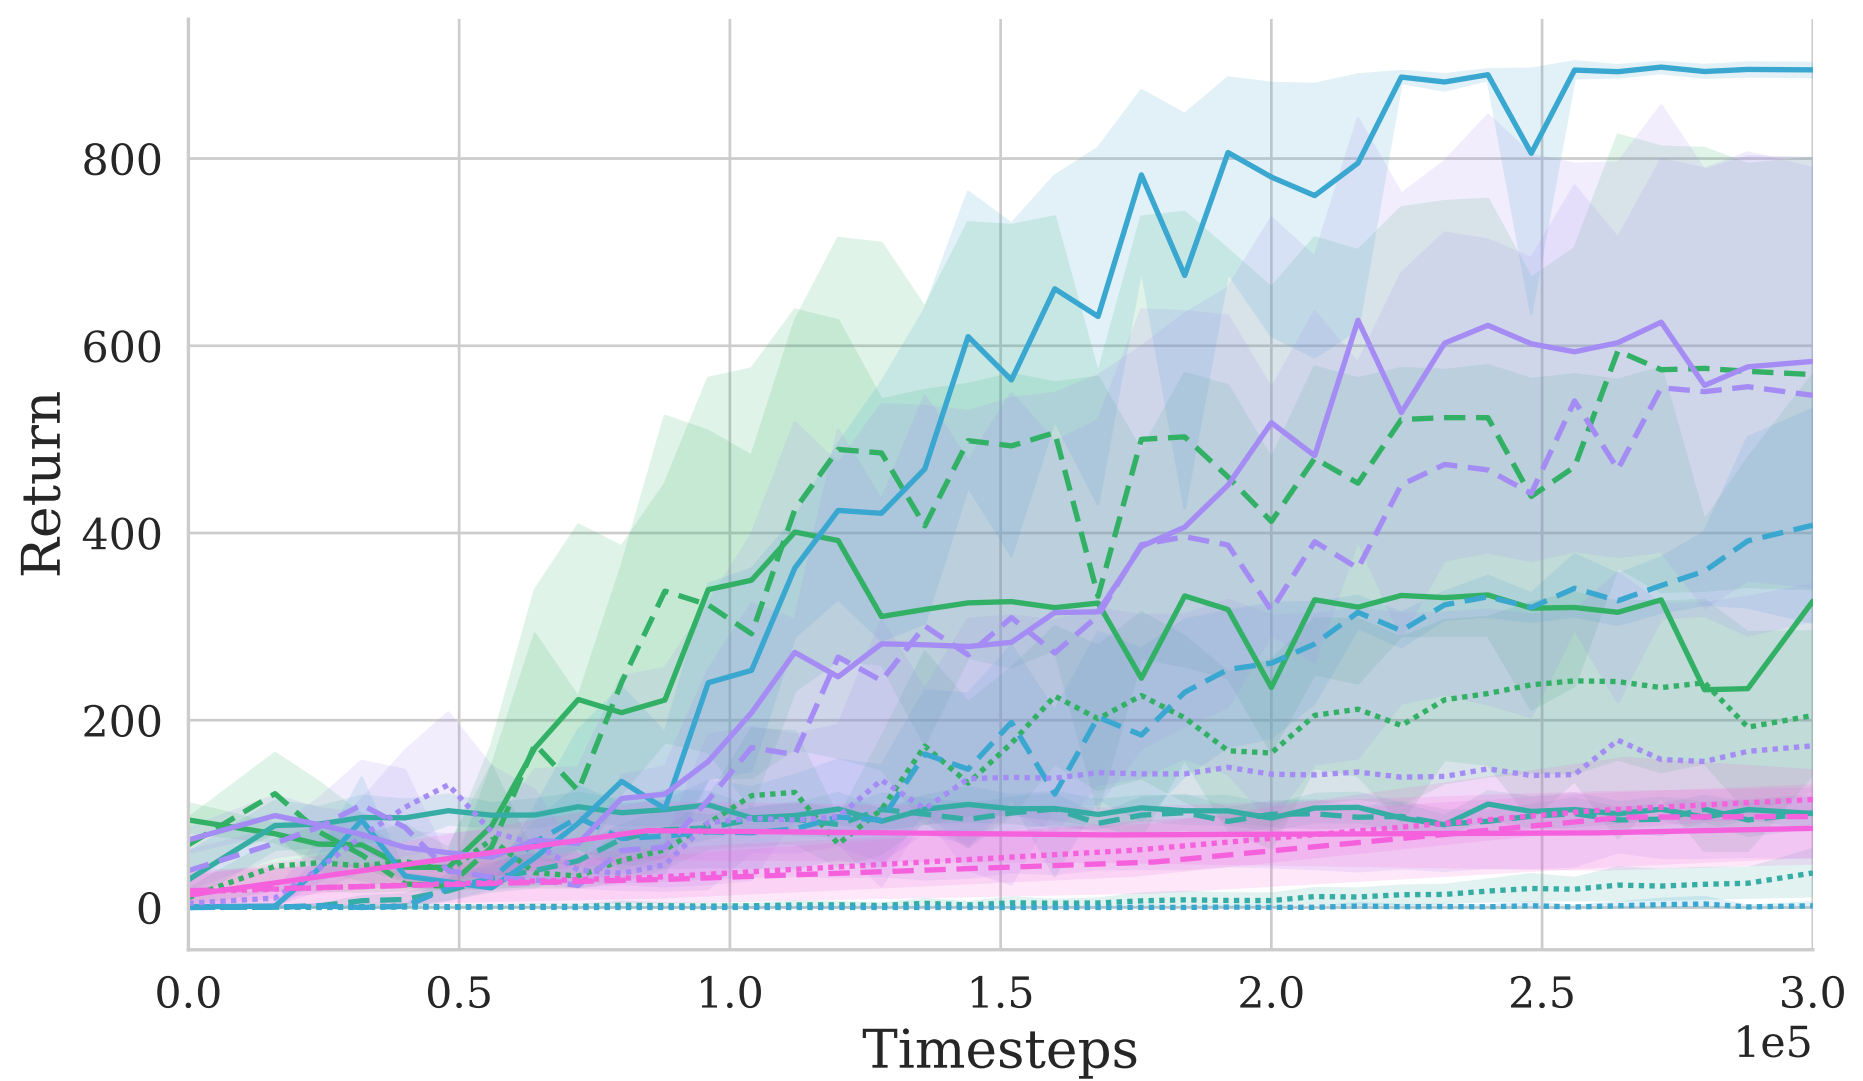

Supplement: supplementary_material [file seaborn_performance_height.pdf › Compression-Autoencoder/MC_performances/baselines/seaborn_performance_height.pdf]

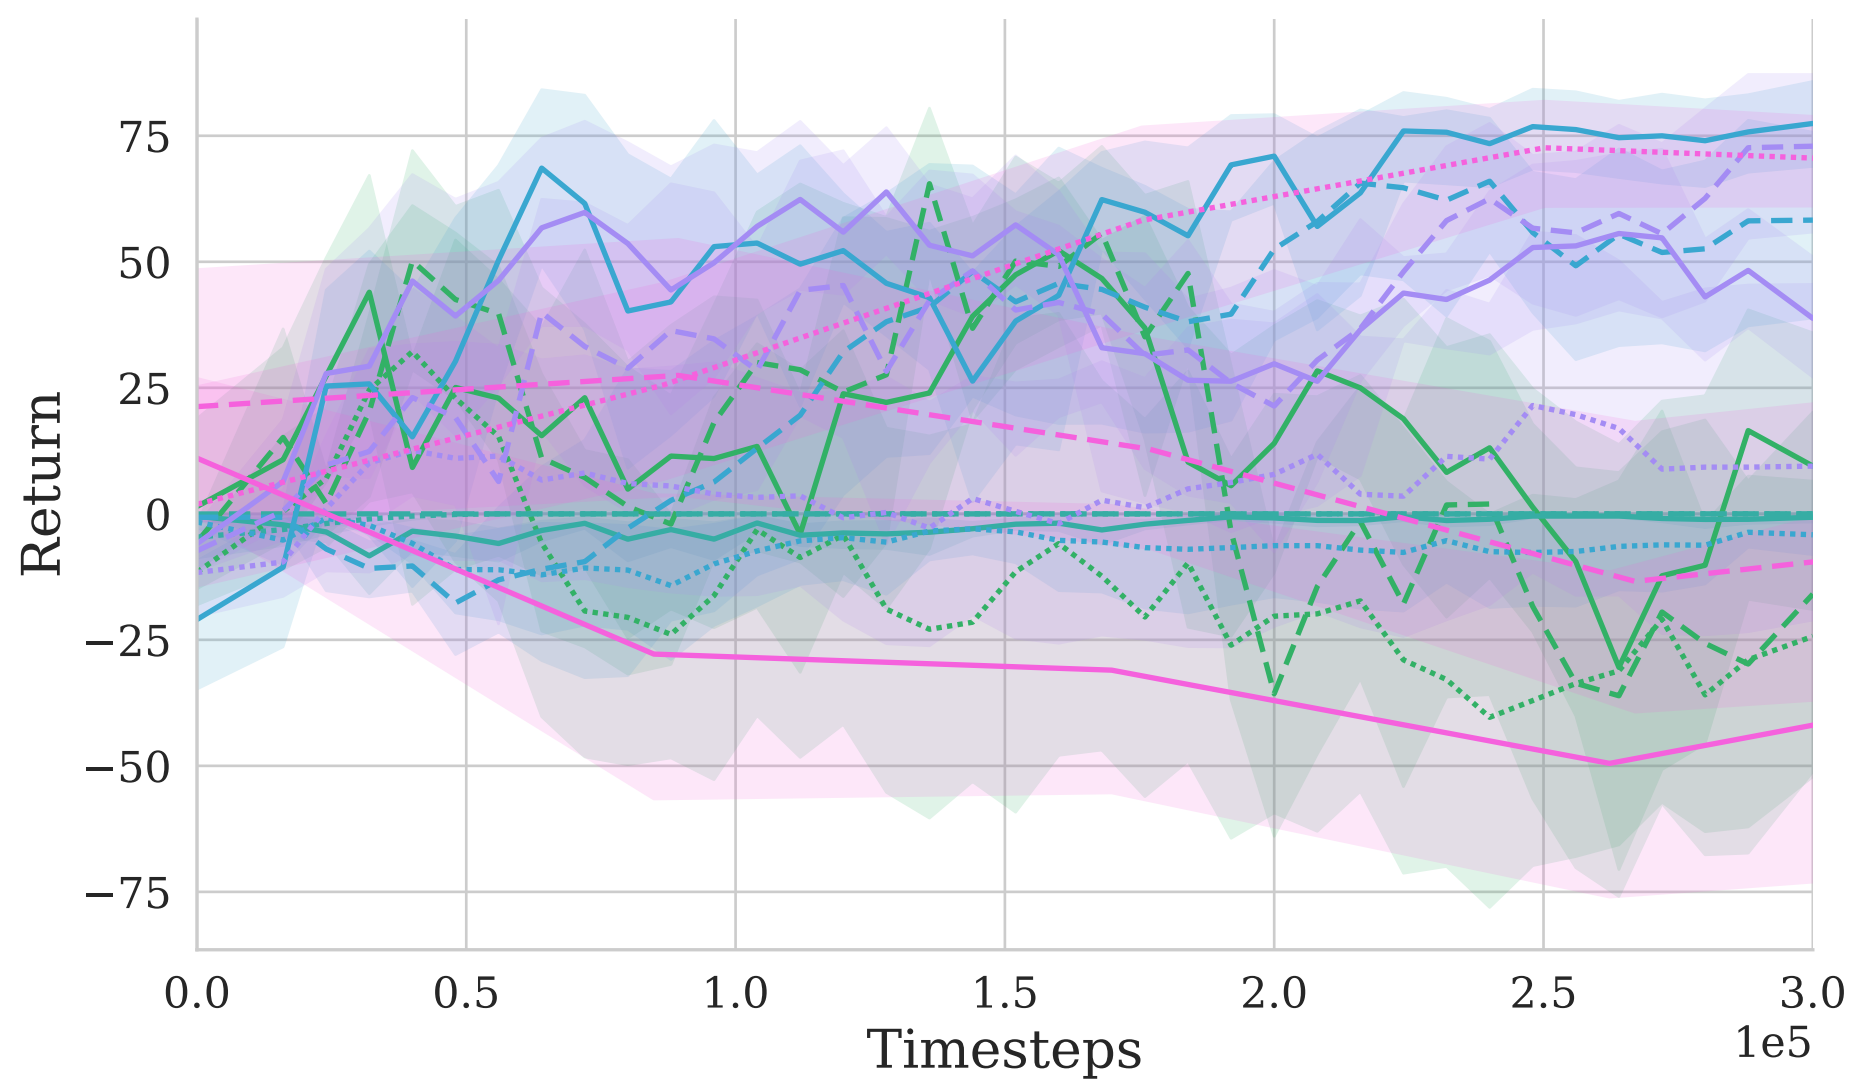

Supplement: supplementary_material [file seaborn_performance_left.pdf › Compression-Autoencoder/MC_performances/baselines/seaborn_performance_left.pdf]

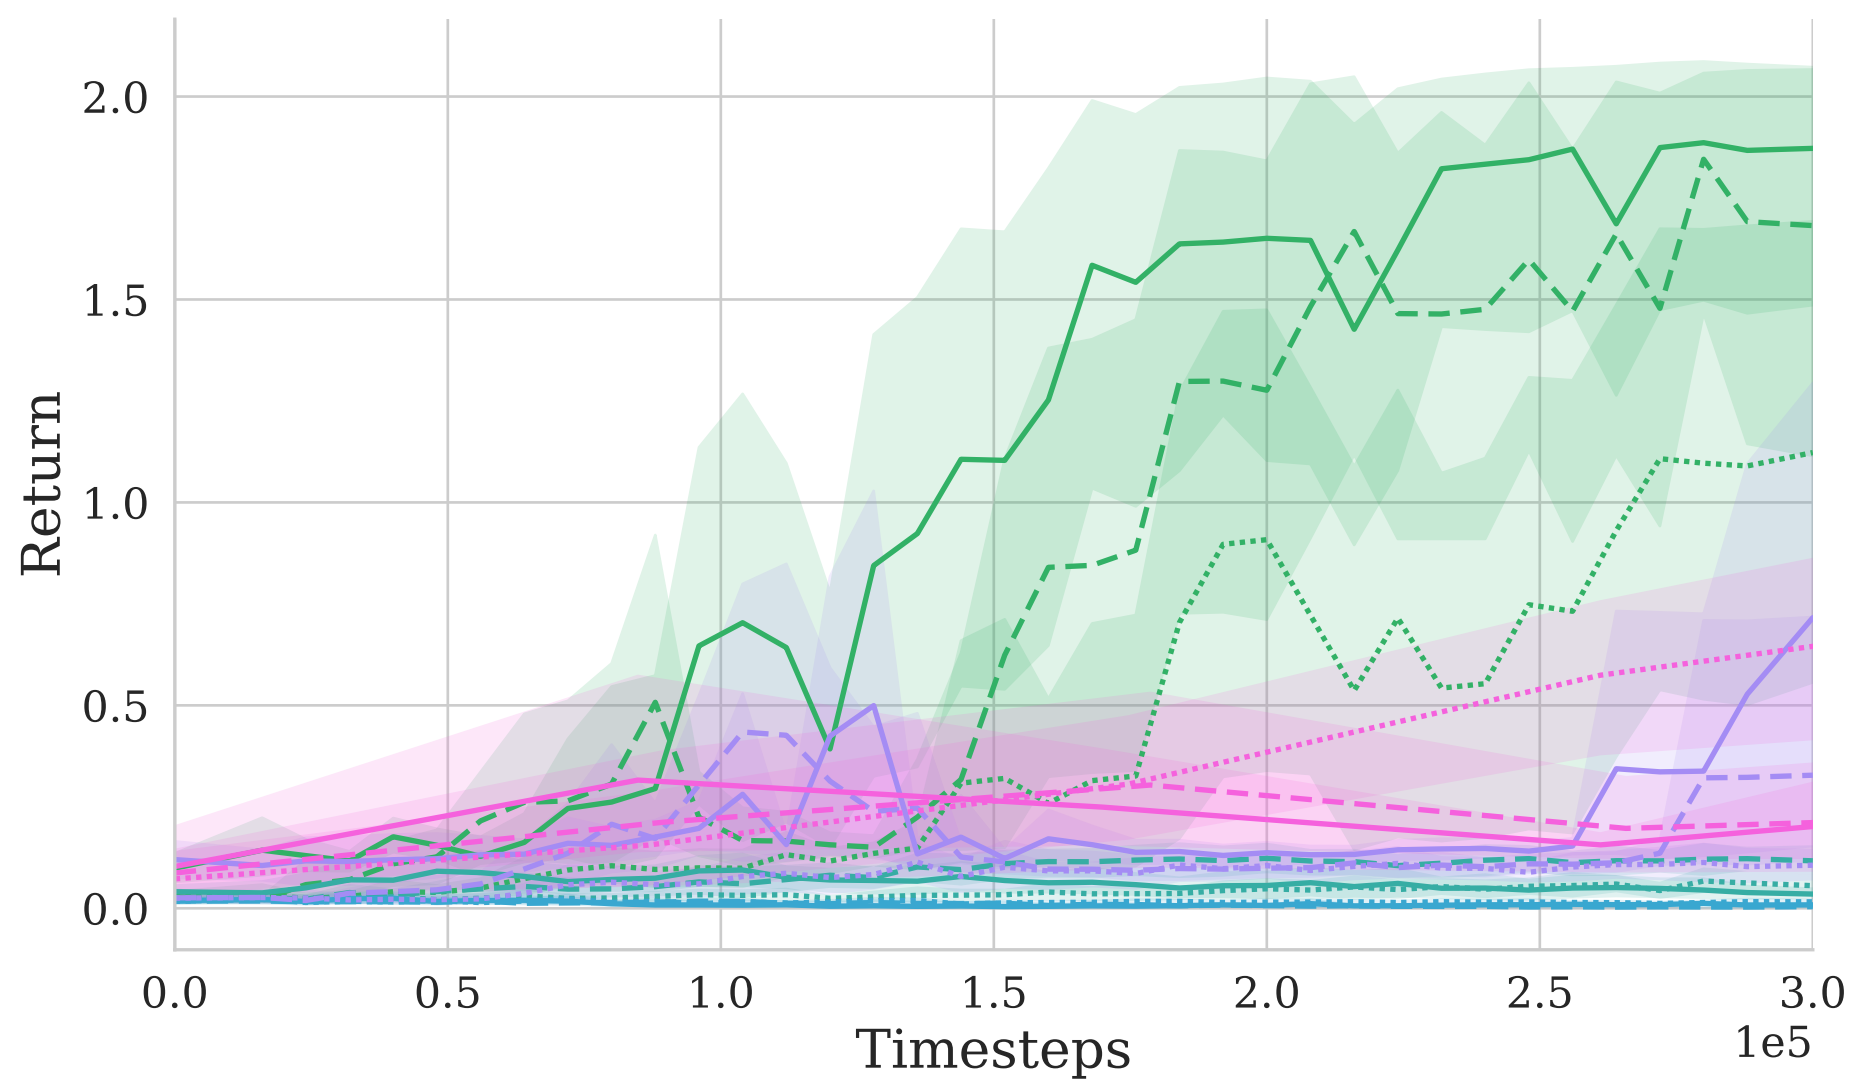

Supplement: supplementary_material [file seaborn_performance_speed.pdf › Compression-Autoencoder/MC_performances/baselines/seaborn_performance_speed.pdf]

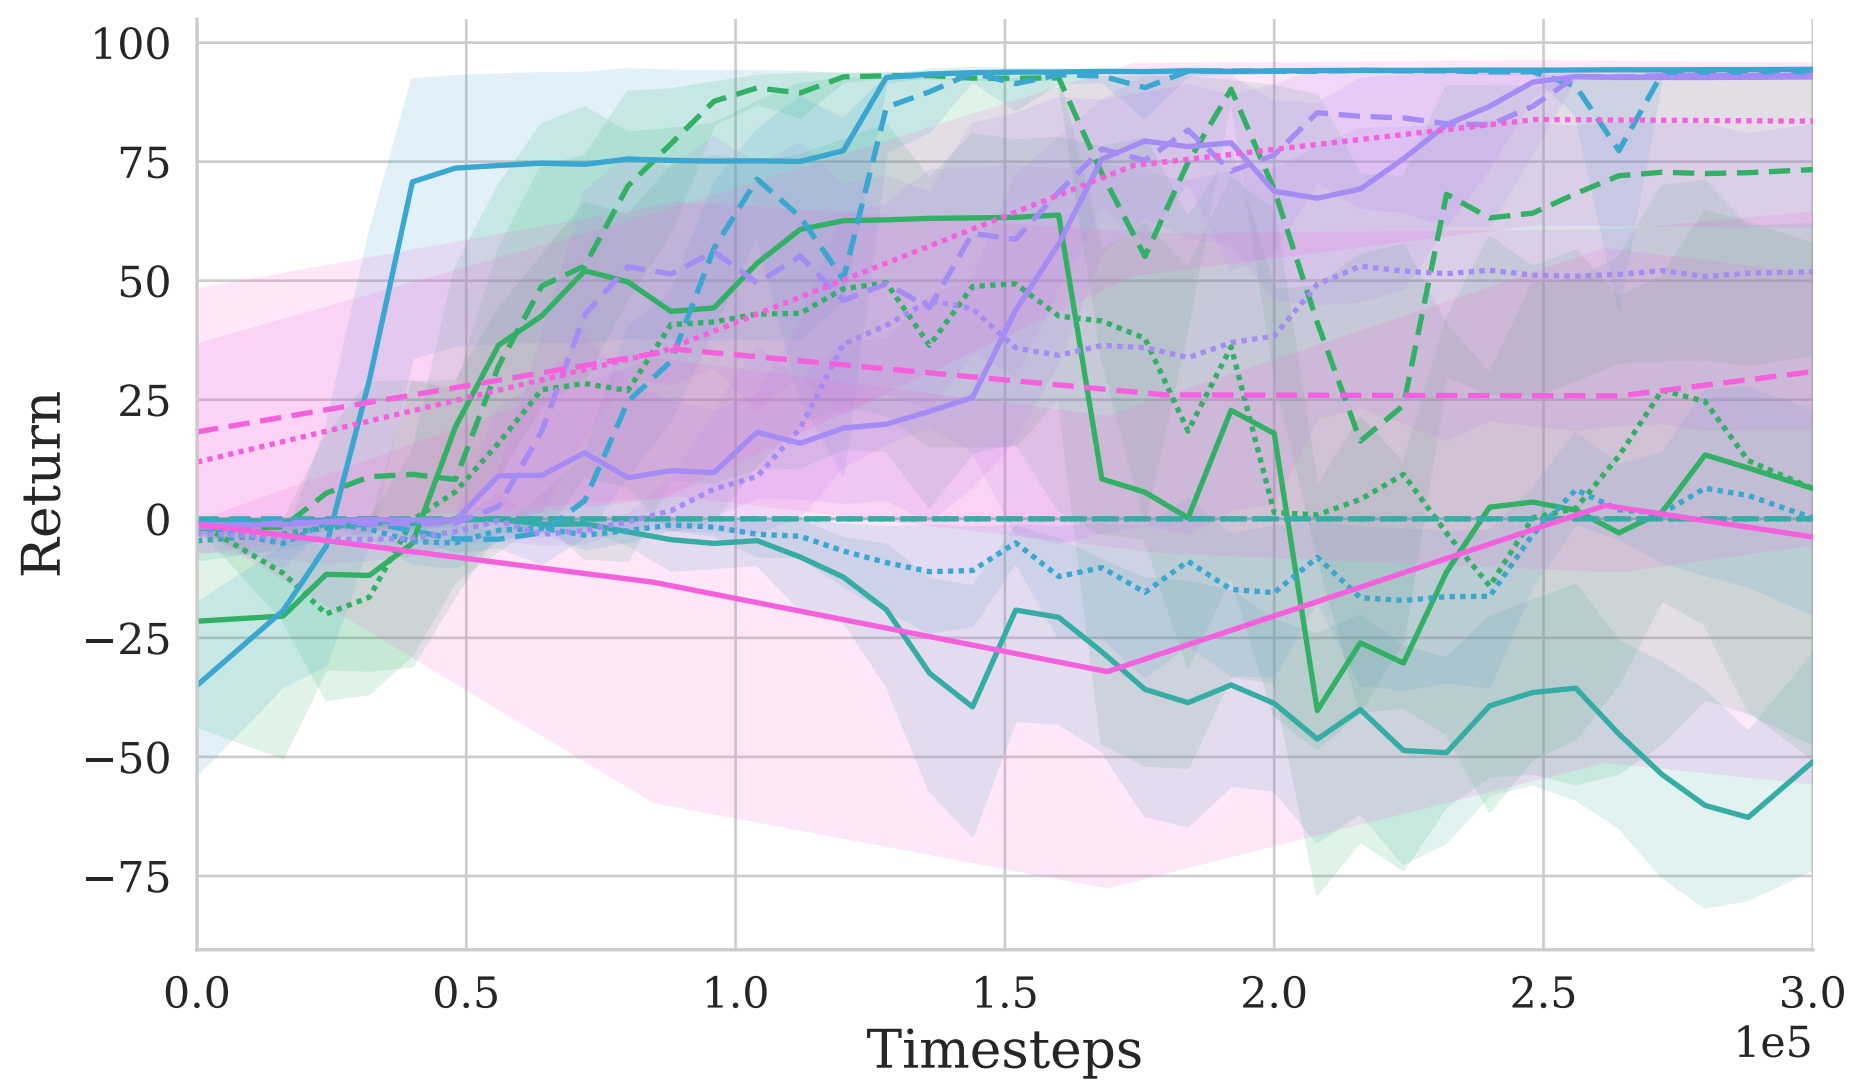

Supplement: supplementary_material [file seaborn_performance_standard.pdf › Compression-Autoencoder/MC_performances/baselines/seaborn_performance_standard.pdf]

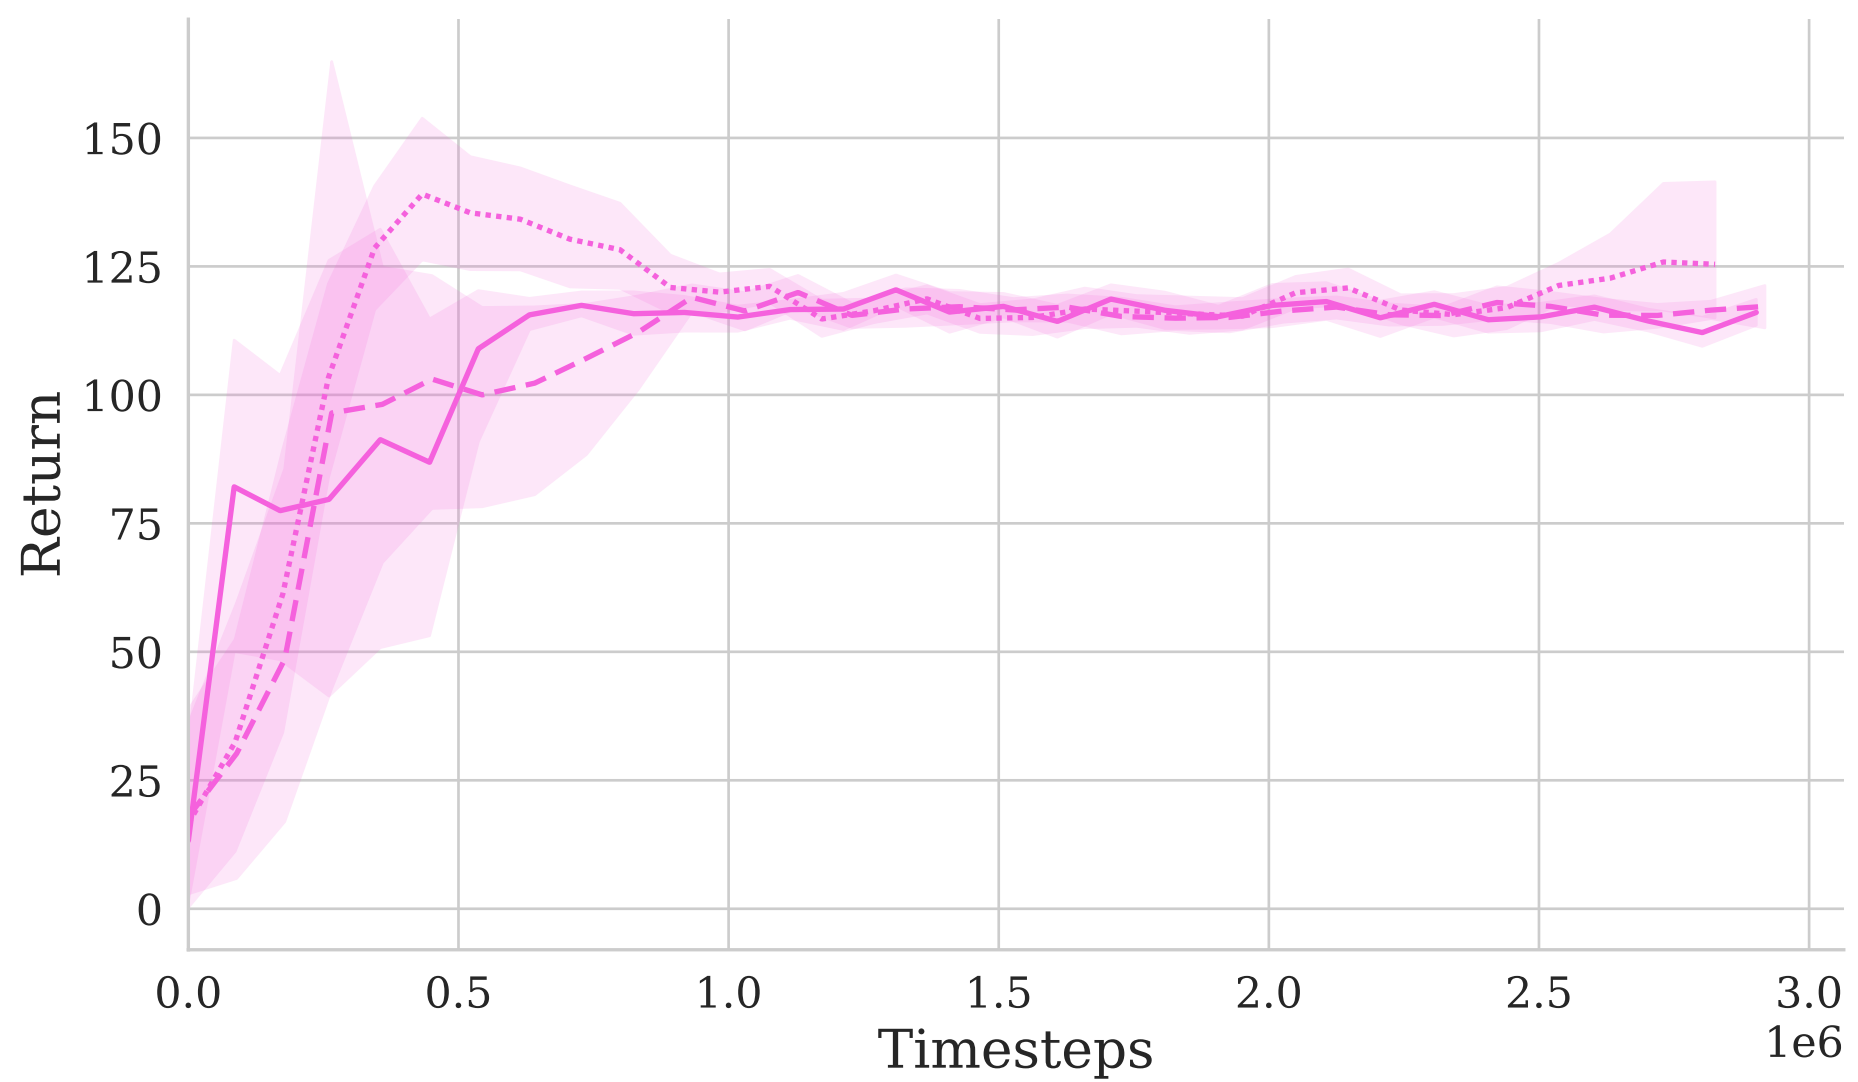

Supplement: supplementary_material [file seaborn_pgpe_only_height.pdf › Compression-Autoencoder/MC_performances/baselines/seaborn_pgpe_only_height.pdf]

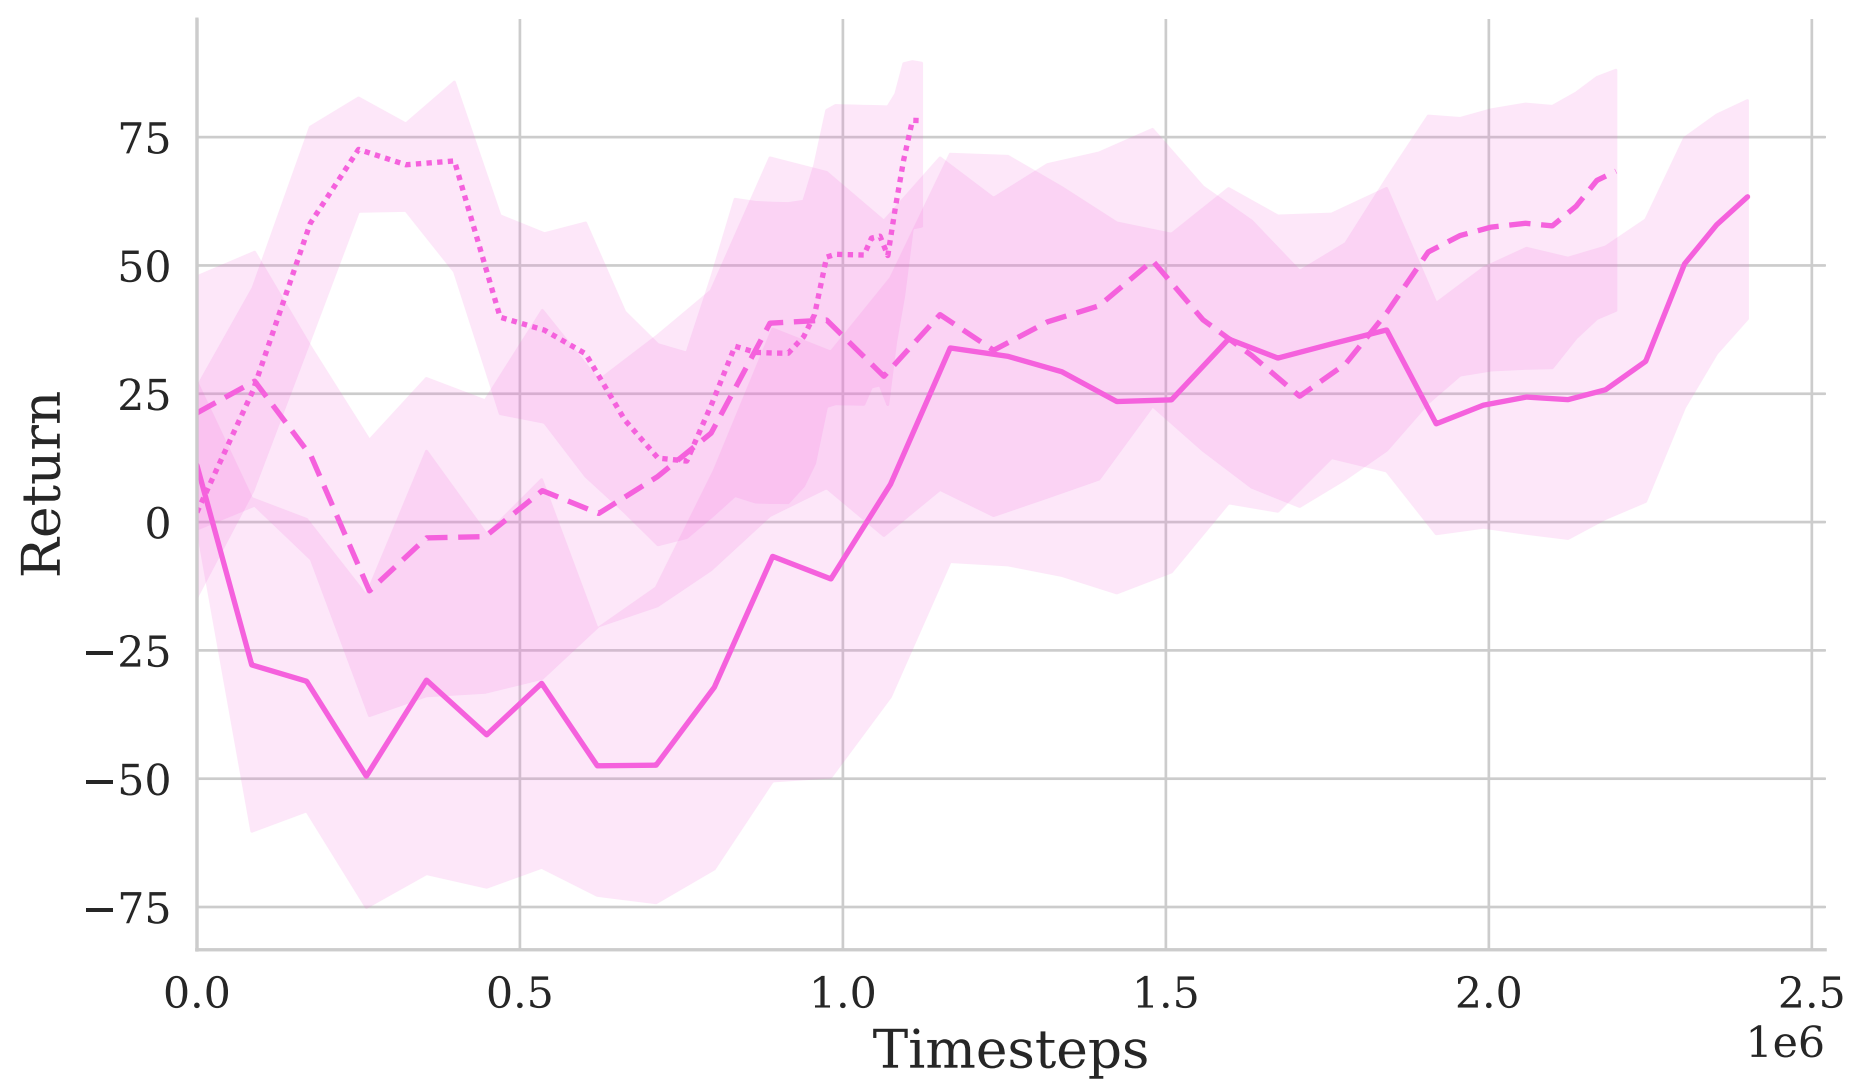

Supplement: supplementary_material [file seaborn_pgpe_only_left.pdf › Compression-Autoencoder/MC_performances/baselines/seaborn_pgpe_only_left.pdf]

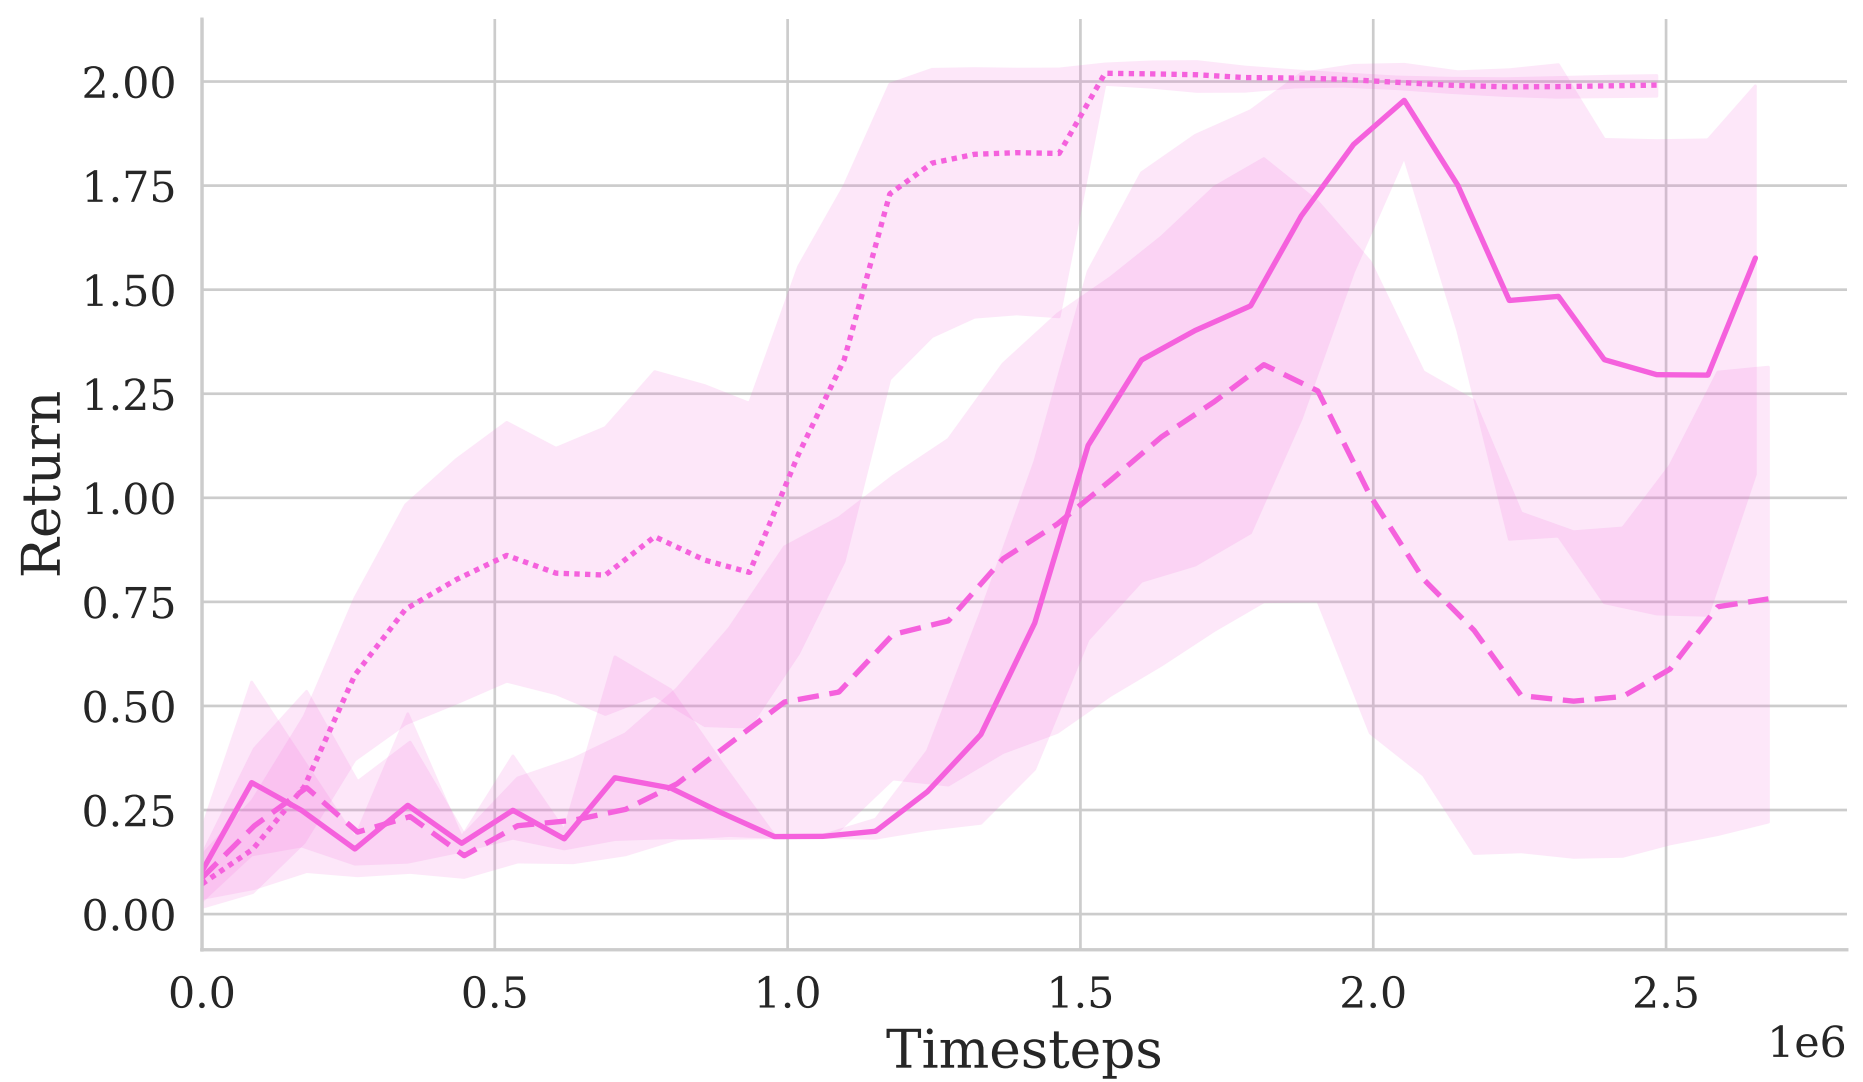

Supplement: supplementary_material [file seaborn_pgpe_only_speed.pdf › Compression-Autoencoder/MC_performances/baselines/seaborn_pgpe_only_speed.pdf]

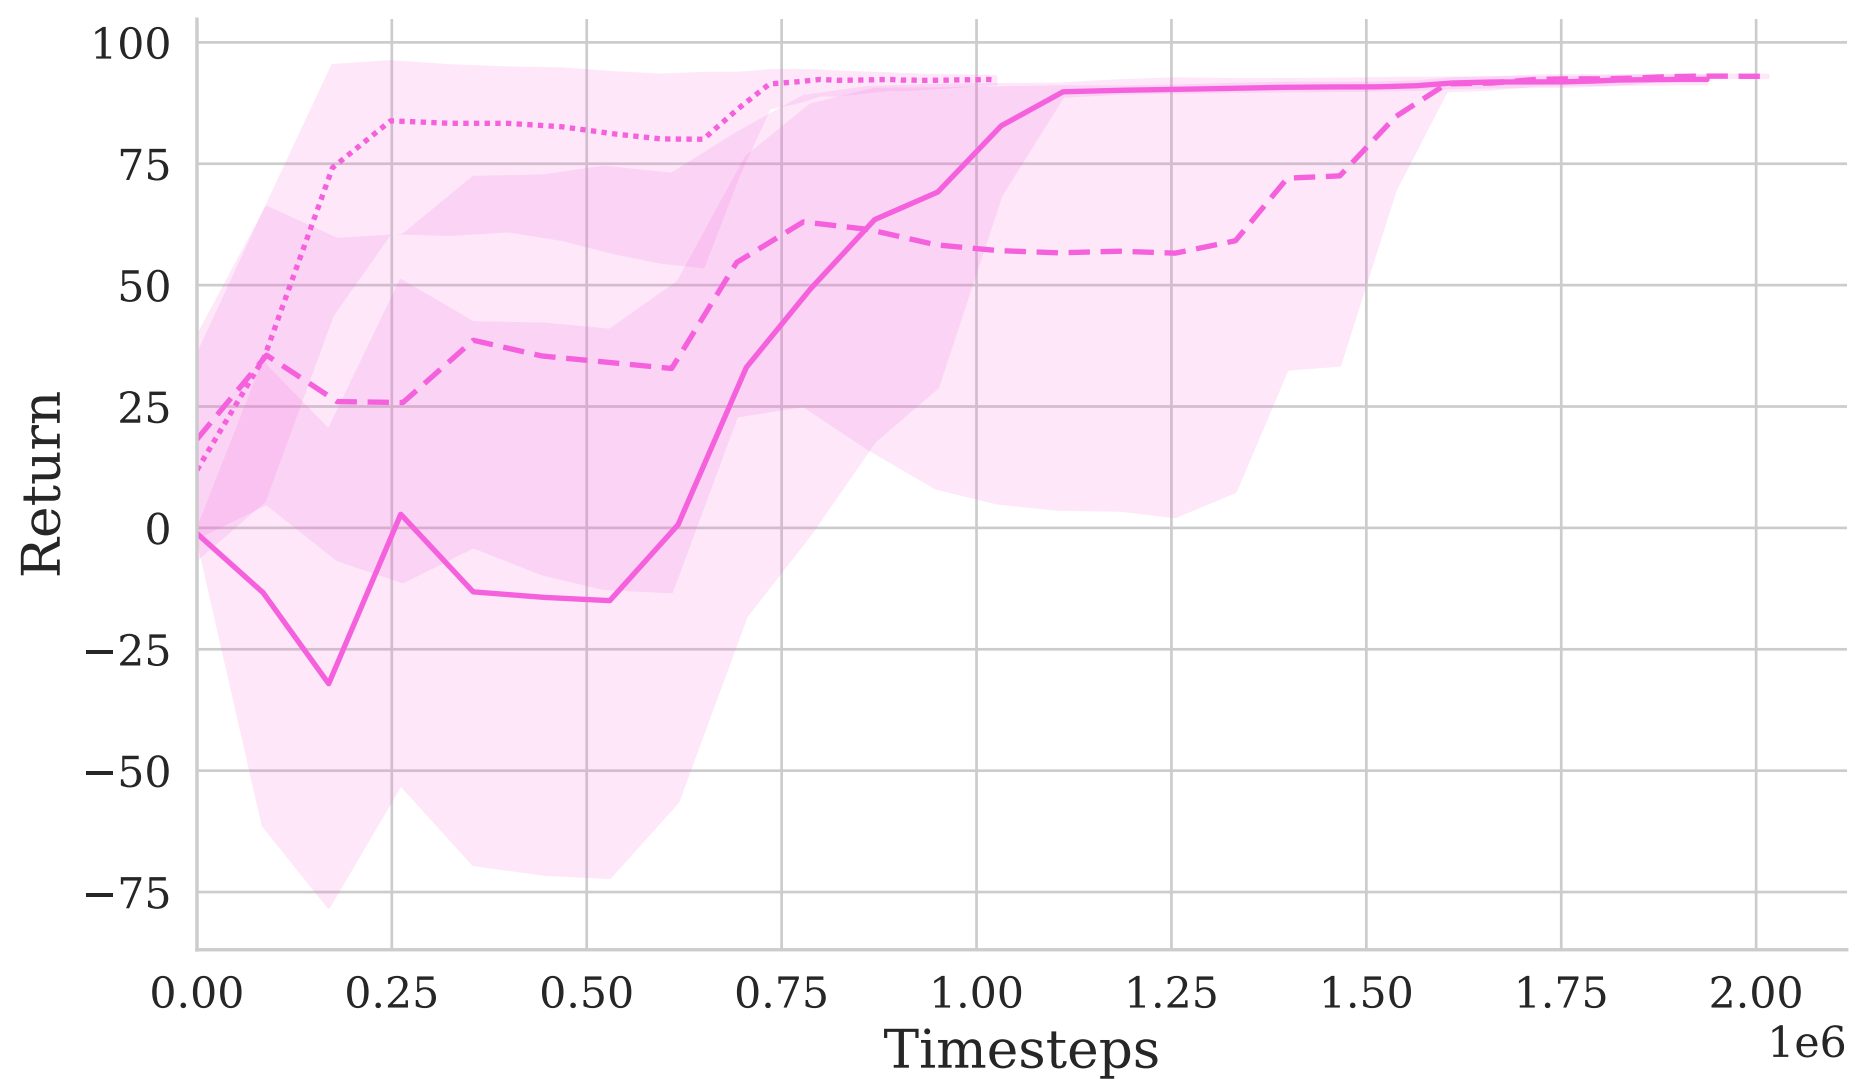

Supplement: supplementary_material [file seaborn_pgpe_only_standard.pdf › Compression-Autoencoder/MC_performances/baselines/seaborn_pgpe_only_standard.pdf]

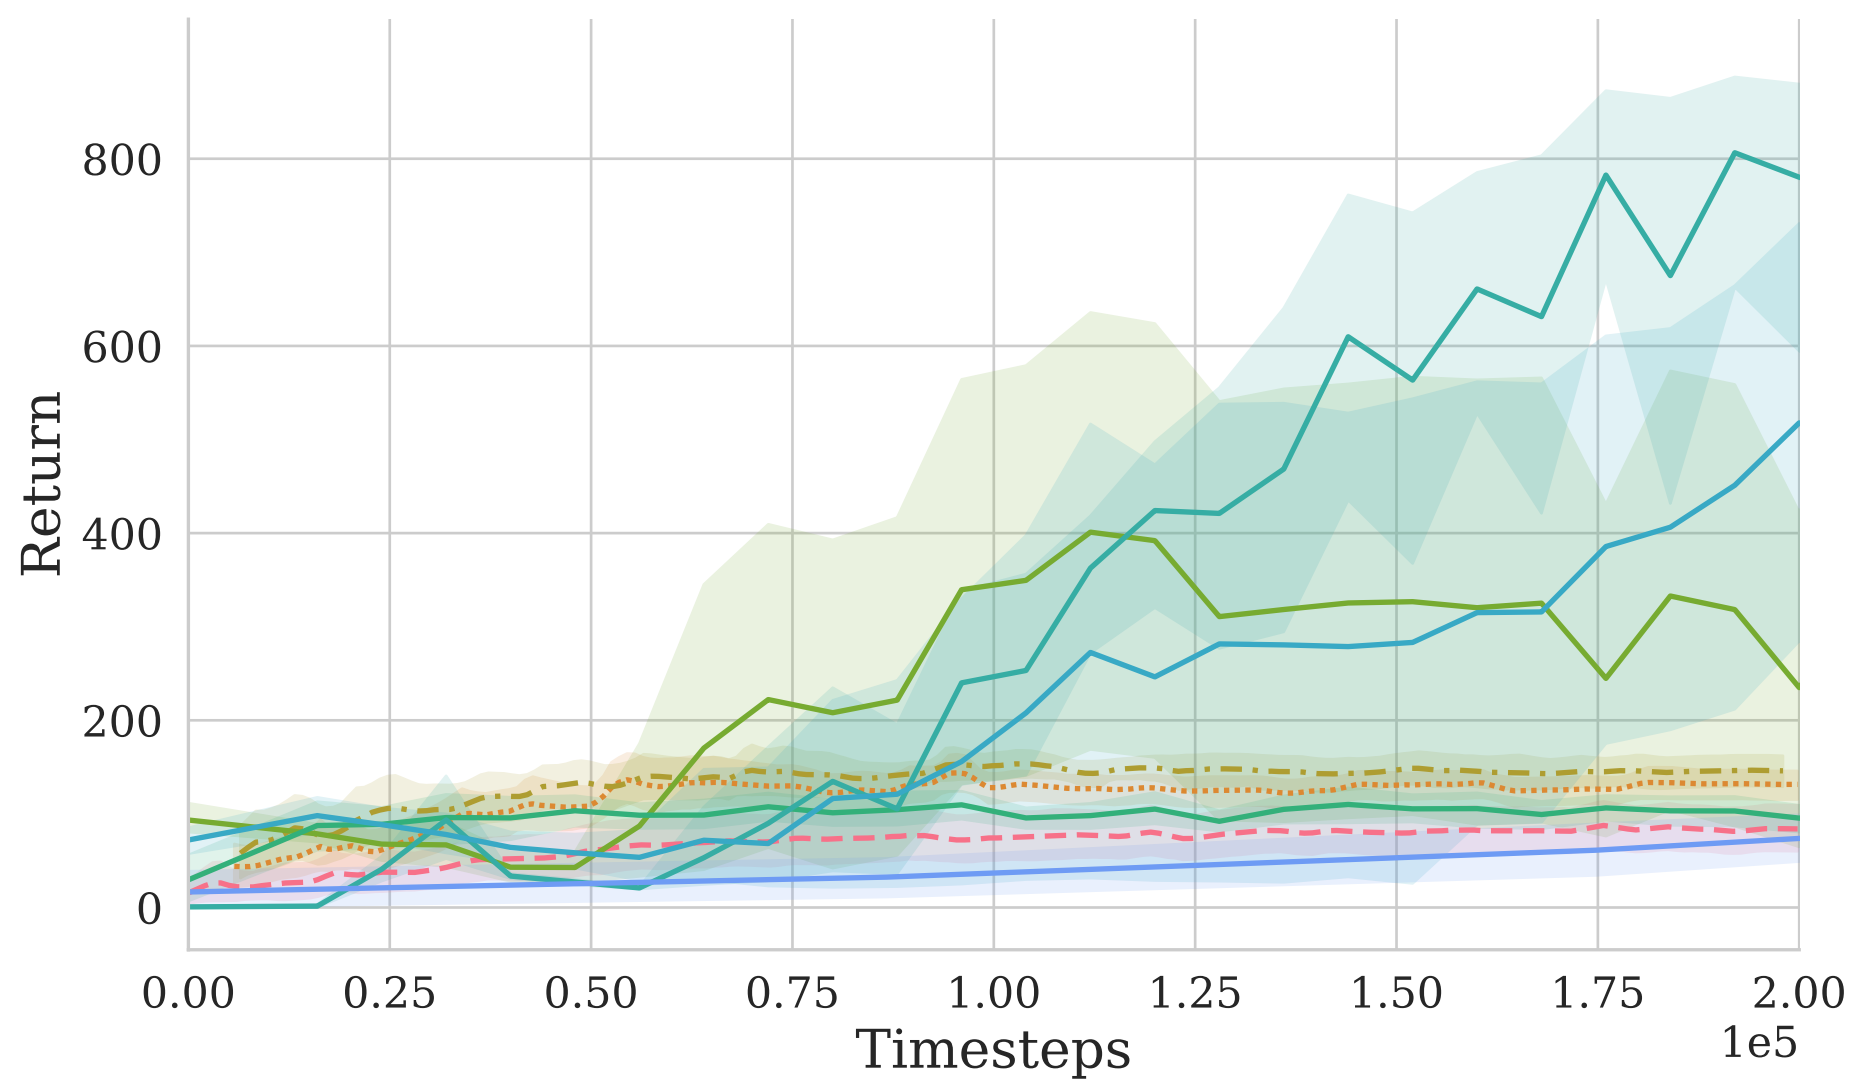

Supplement: supplementary_material [file performance_plot_height.pdf › Compression-Autoencoder/MC_performances/performance_plot_height.pdf]

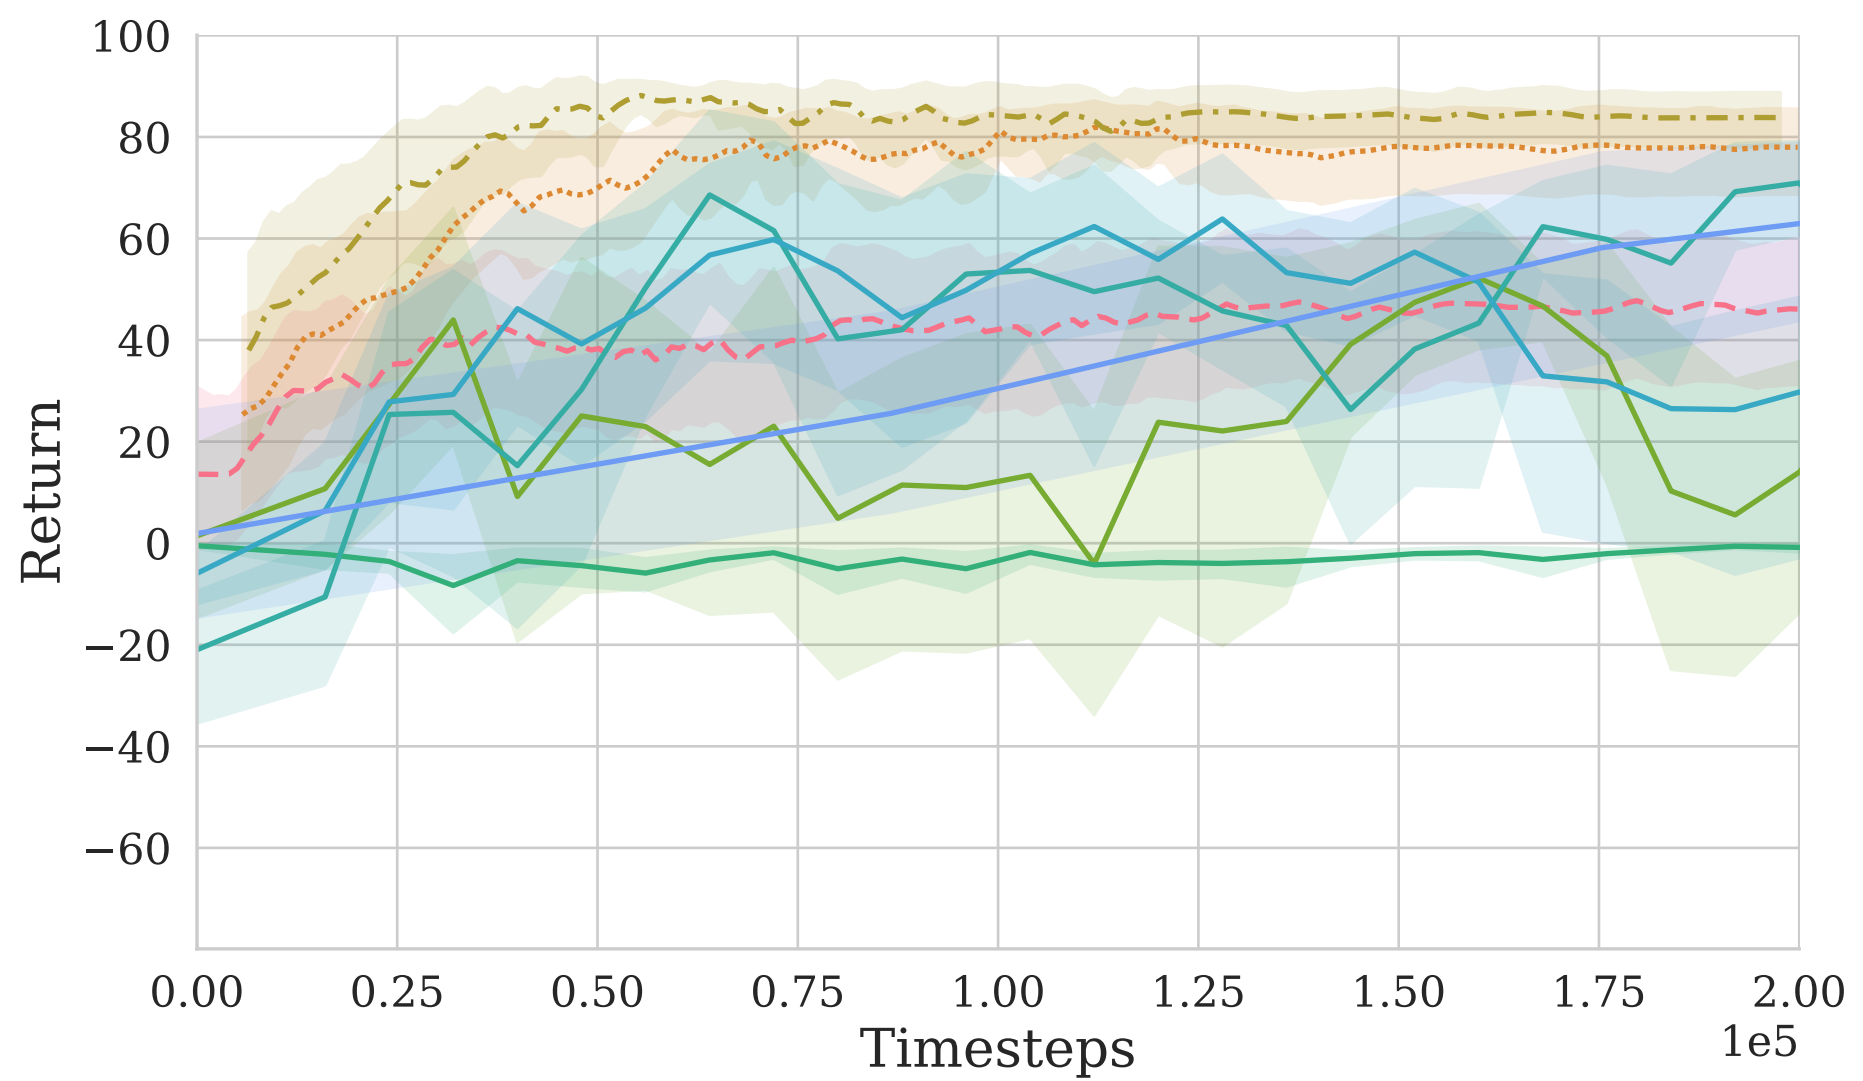

Supplement: supplementary_material [file performance_plot_left.pdf › Compression-Autoencoder/MC_performances/performance_plot_left.pdf]

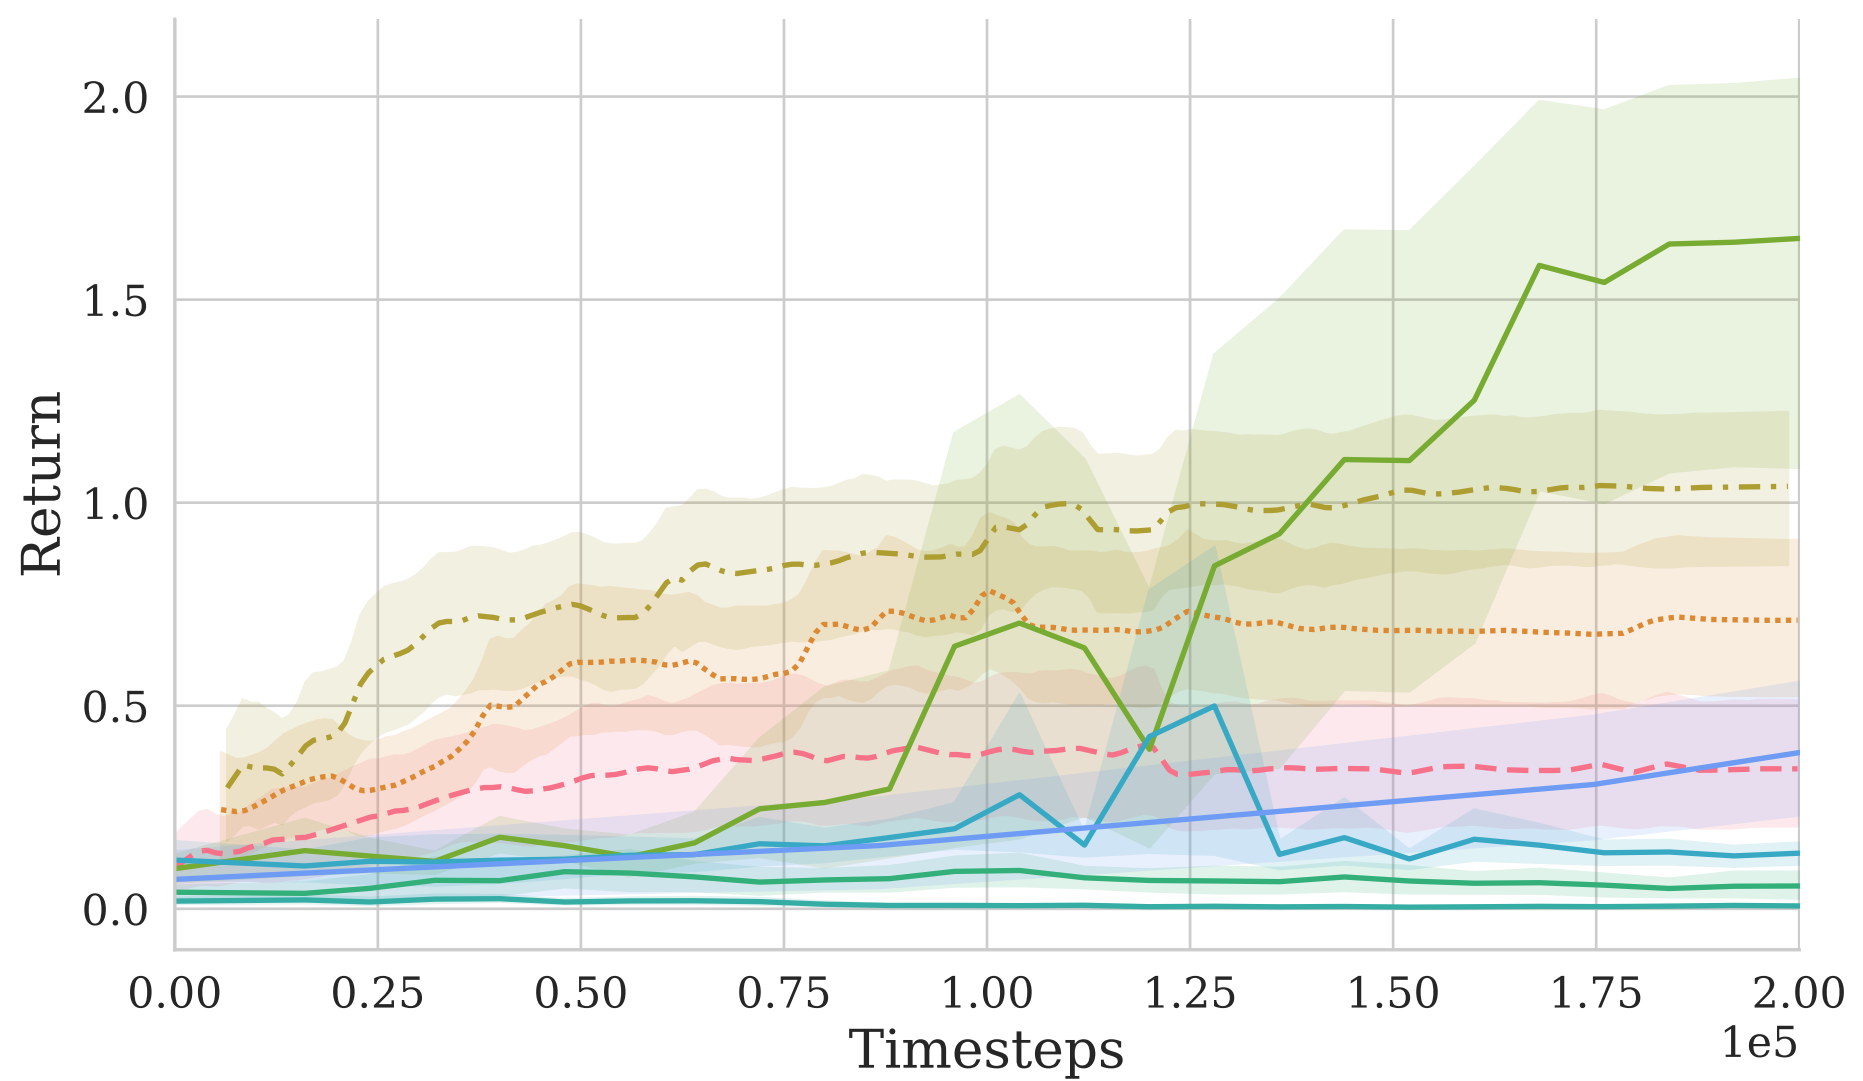

Supplement: supplementary_material [file performance_plot_speed.pdf › Compression-Autoencoder/MC_performances/performance_plot_speed.pdf]

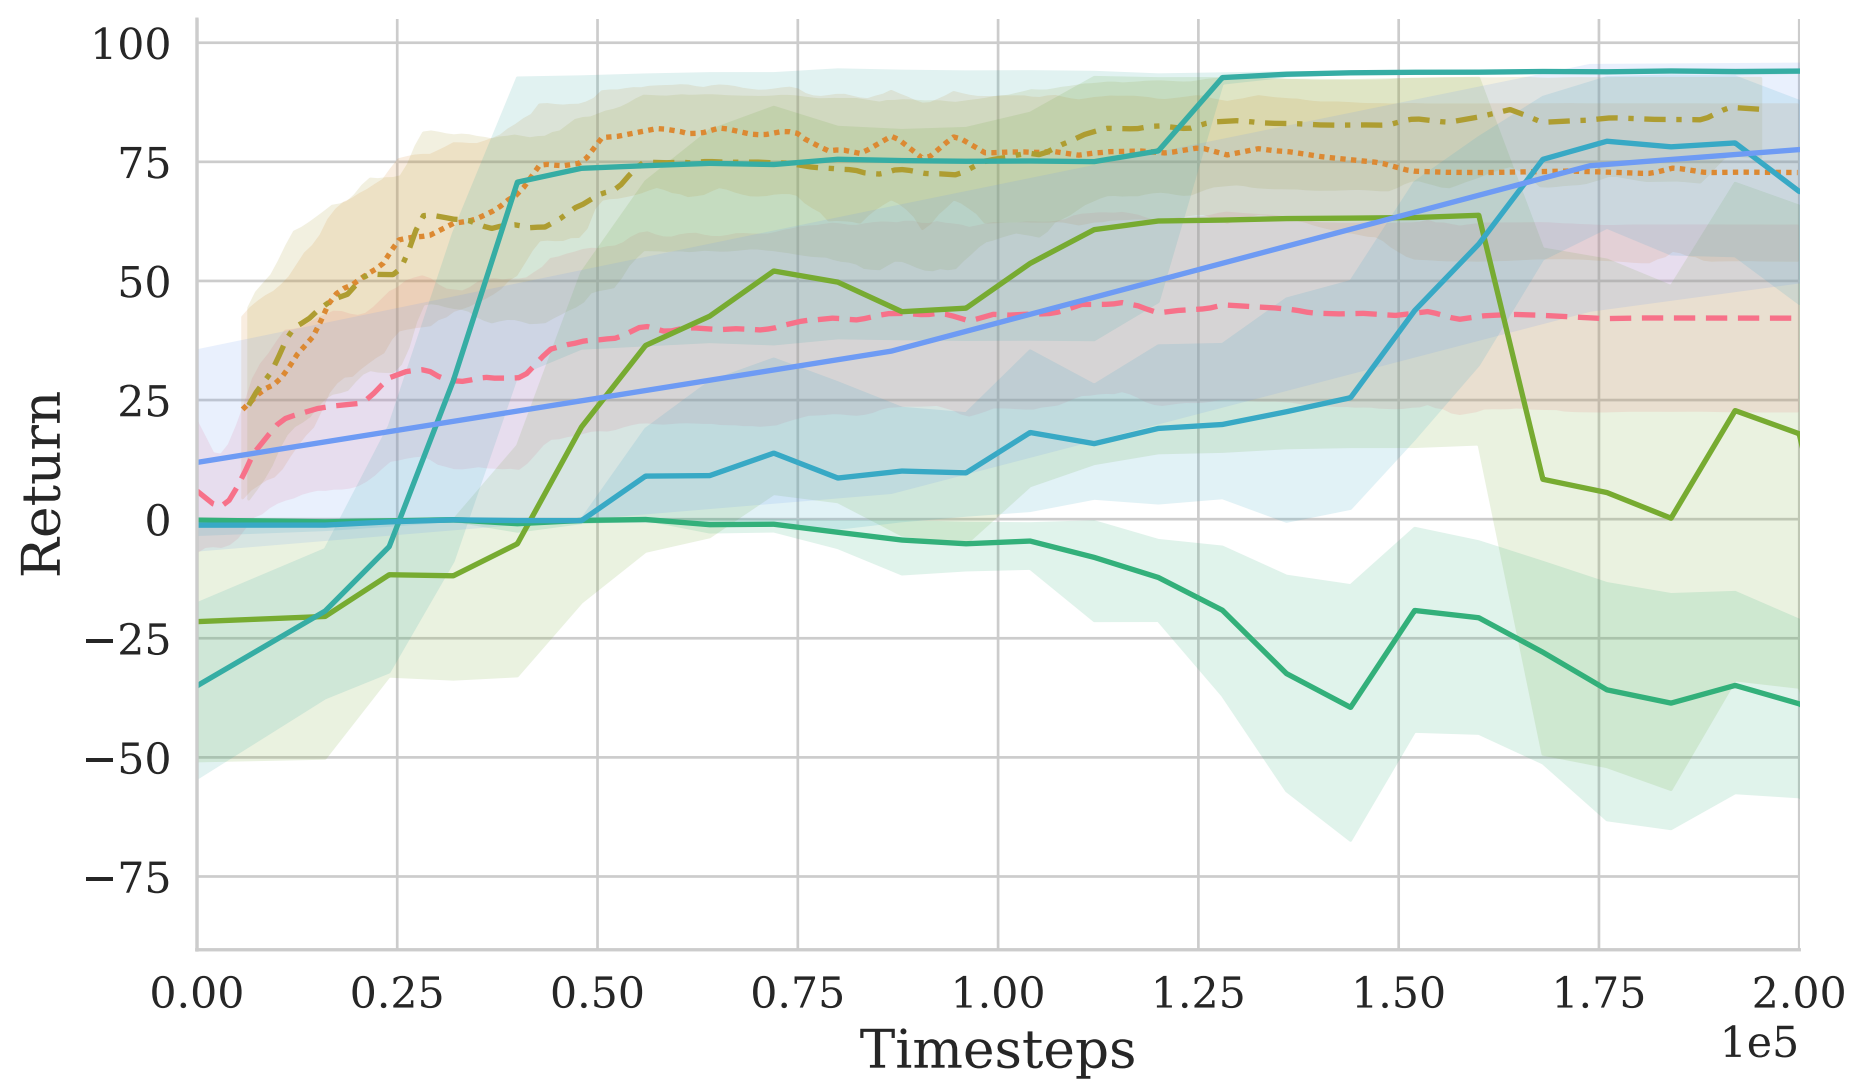

Supplement: supplementary_material [file performance_plot_standard.pdf › Compression-Autoencoder/MC_performances/performance_plot_standard.pdf]

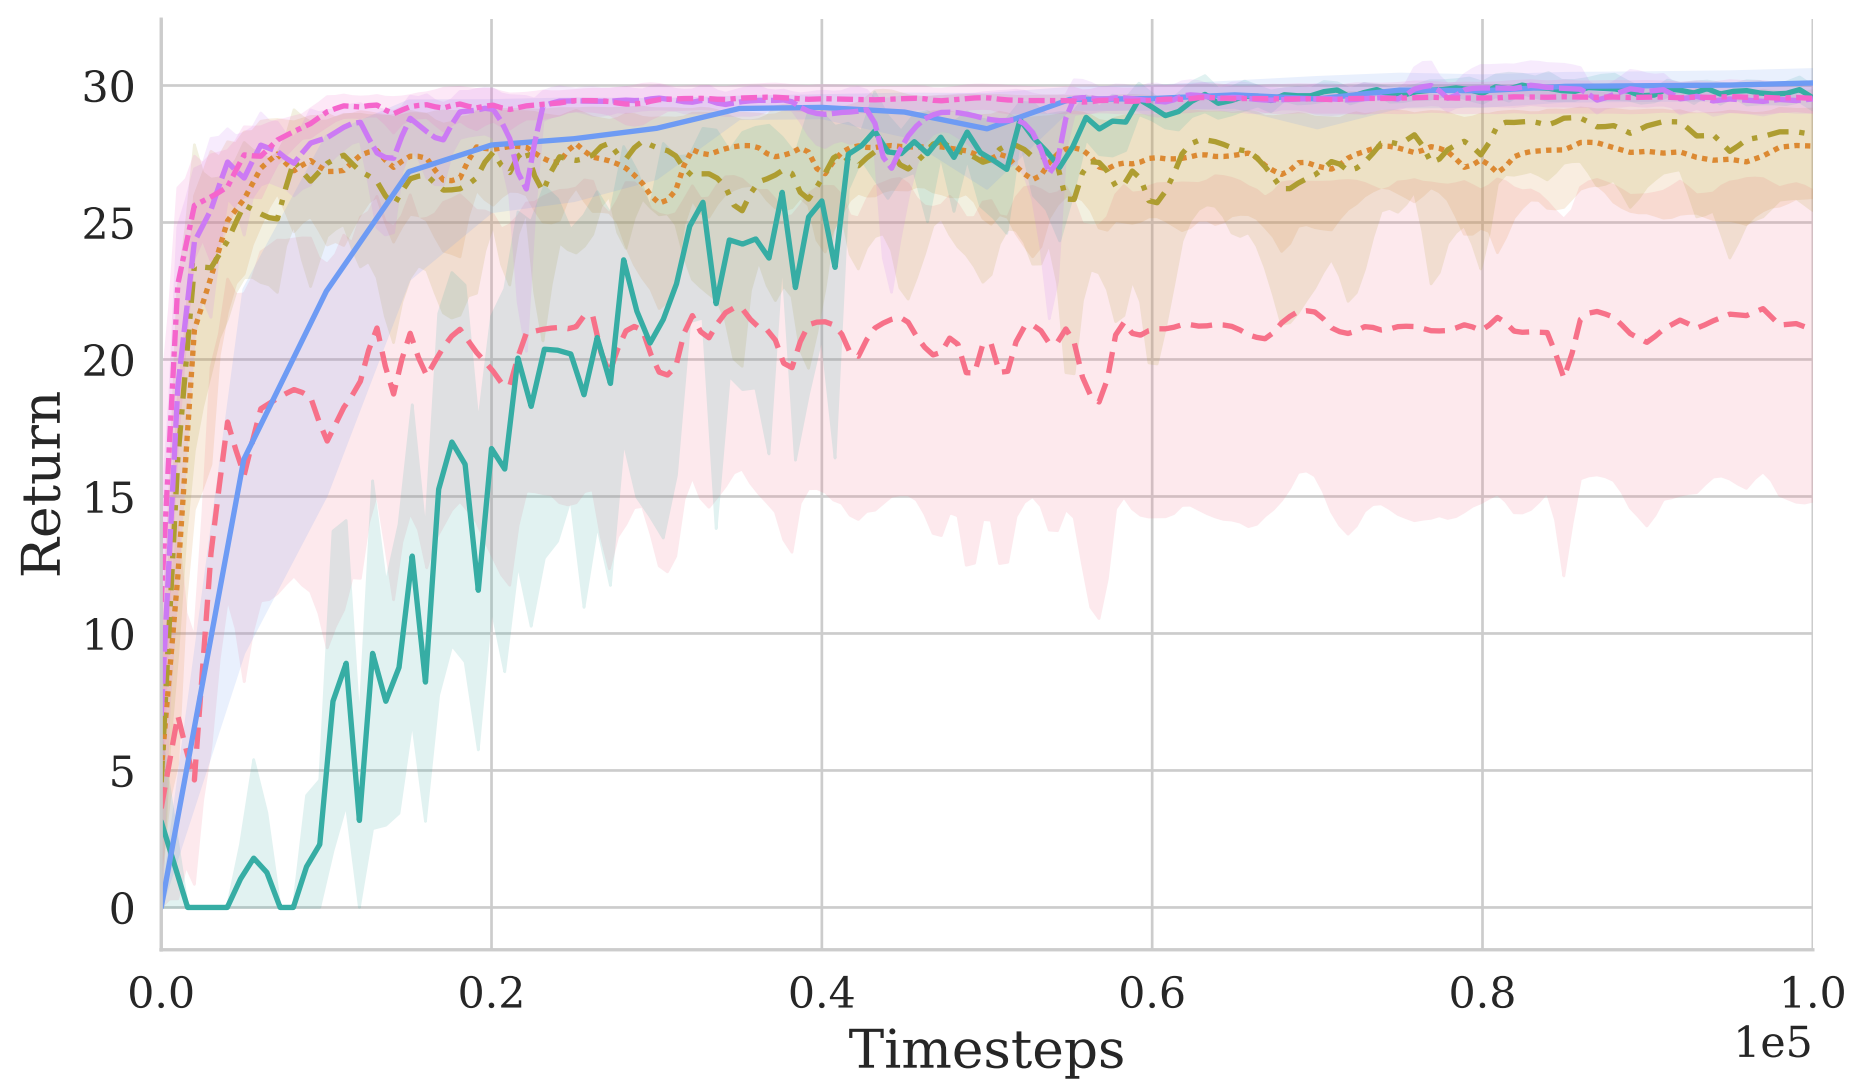

Supplement: supplementary_material [file performance_plot_radial_speed.pdf › Compression-Autoencoder/Reacher_performances/performance_plot_radial_speed.pdf]

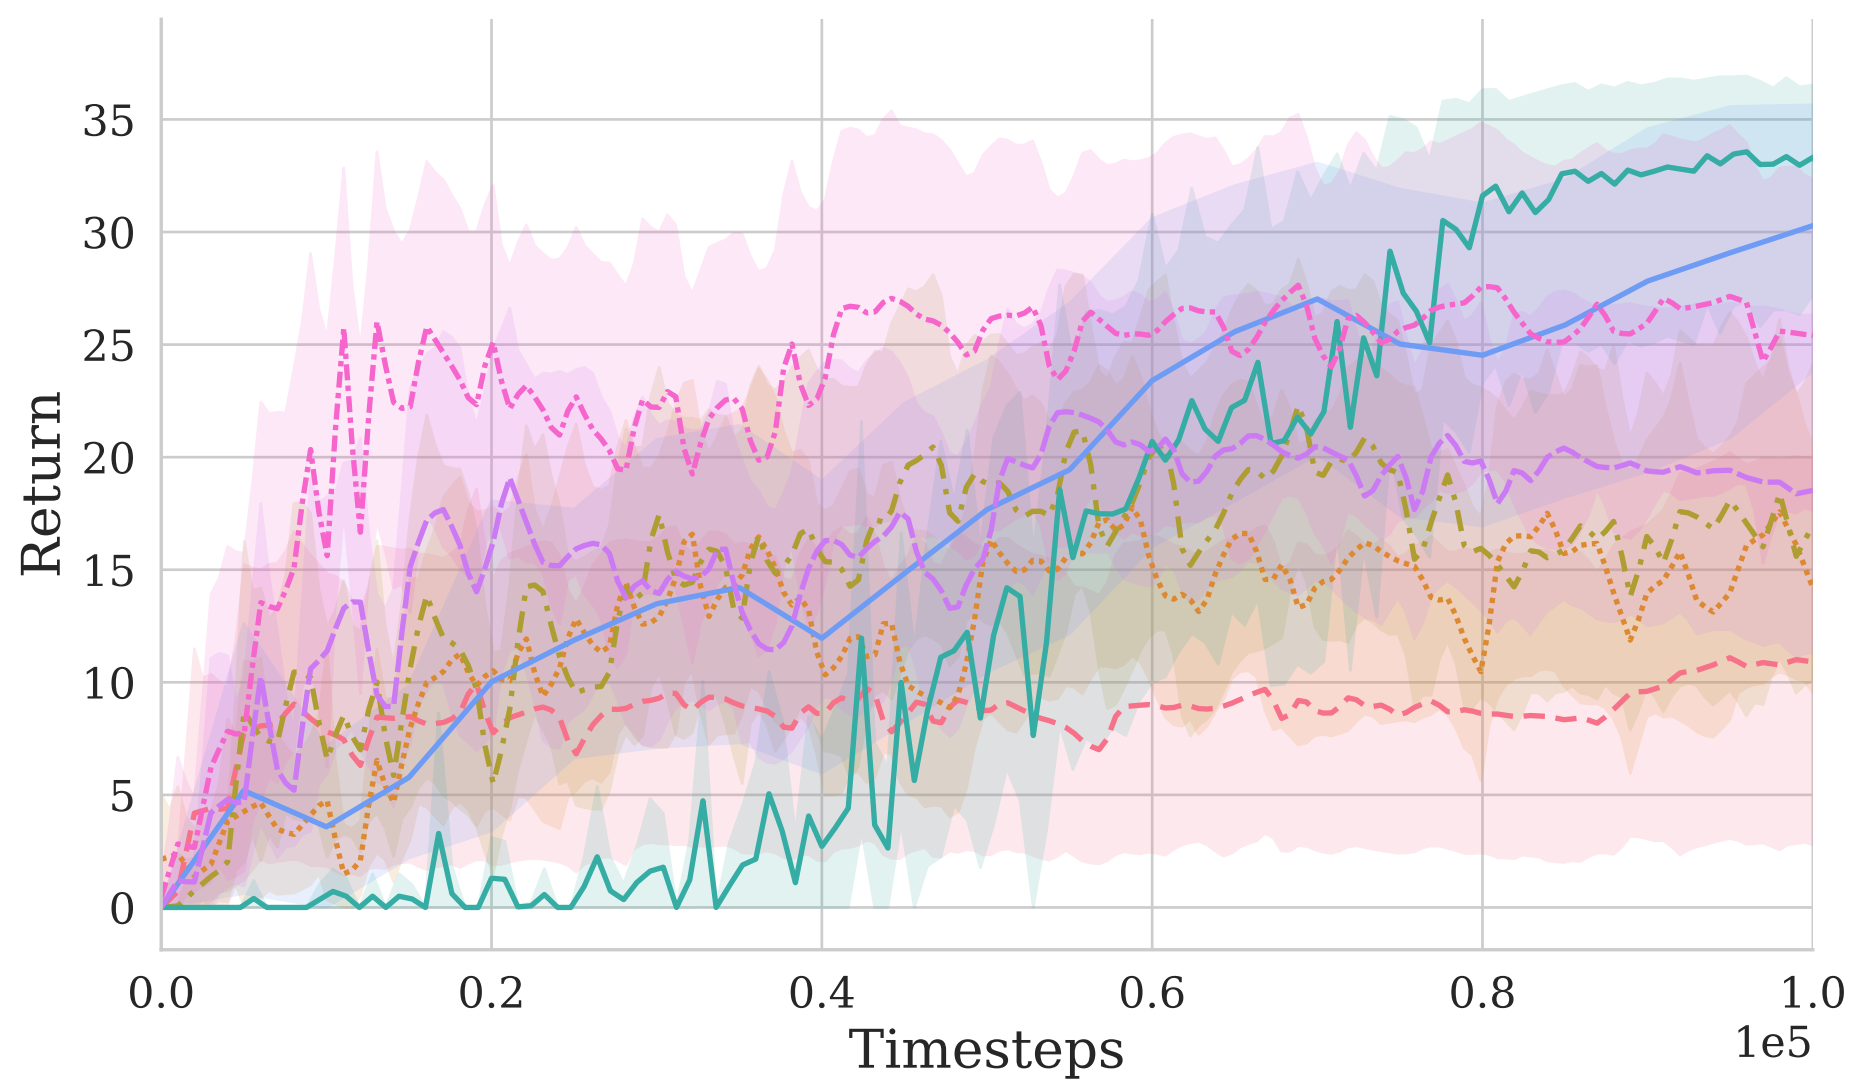

Supplement: supplementary_material [file performance_plot_rot_ccw.pdf › Compression-Autoencoder/Reacher_performances/performance_plot_rot_ccw.pdf]

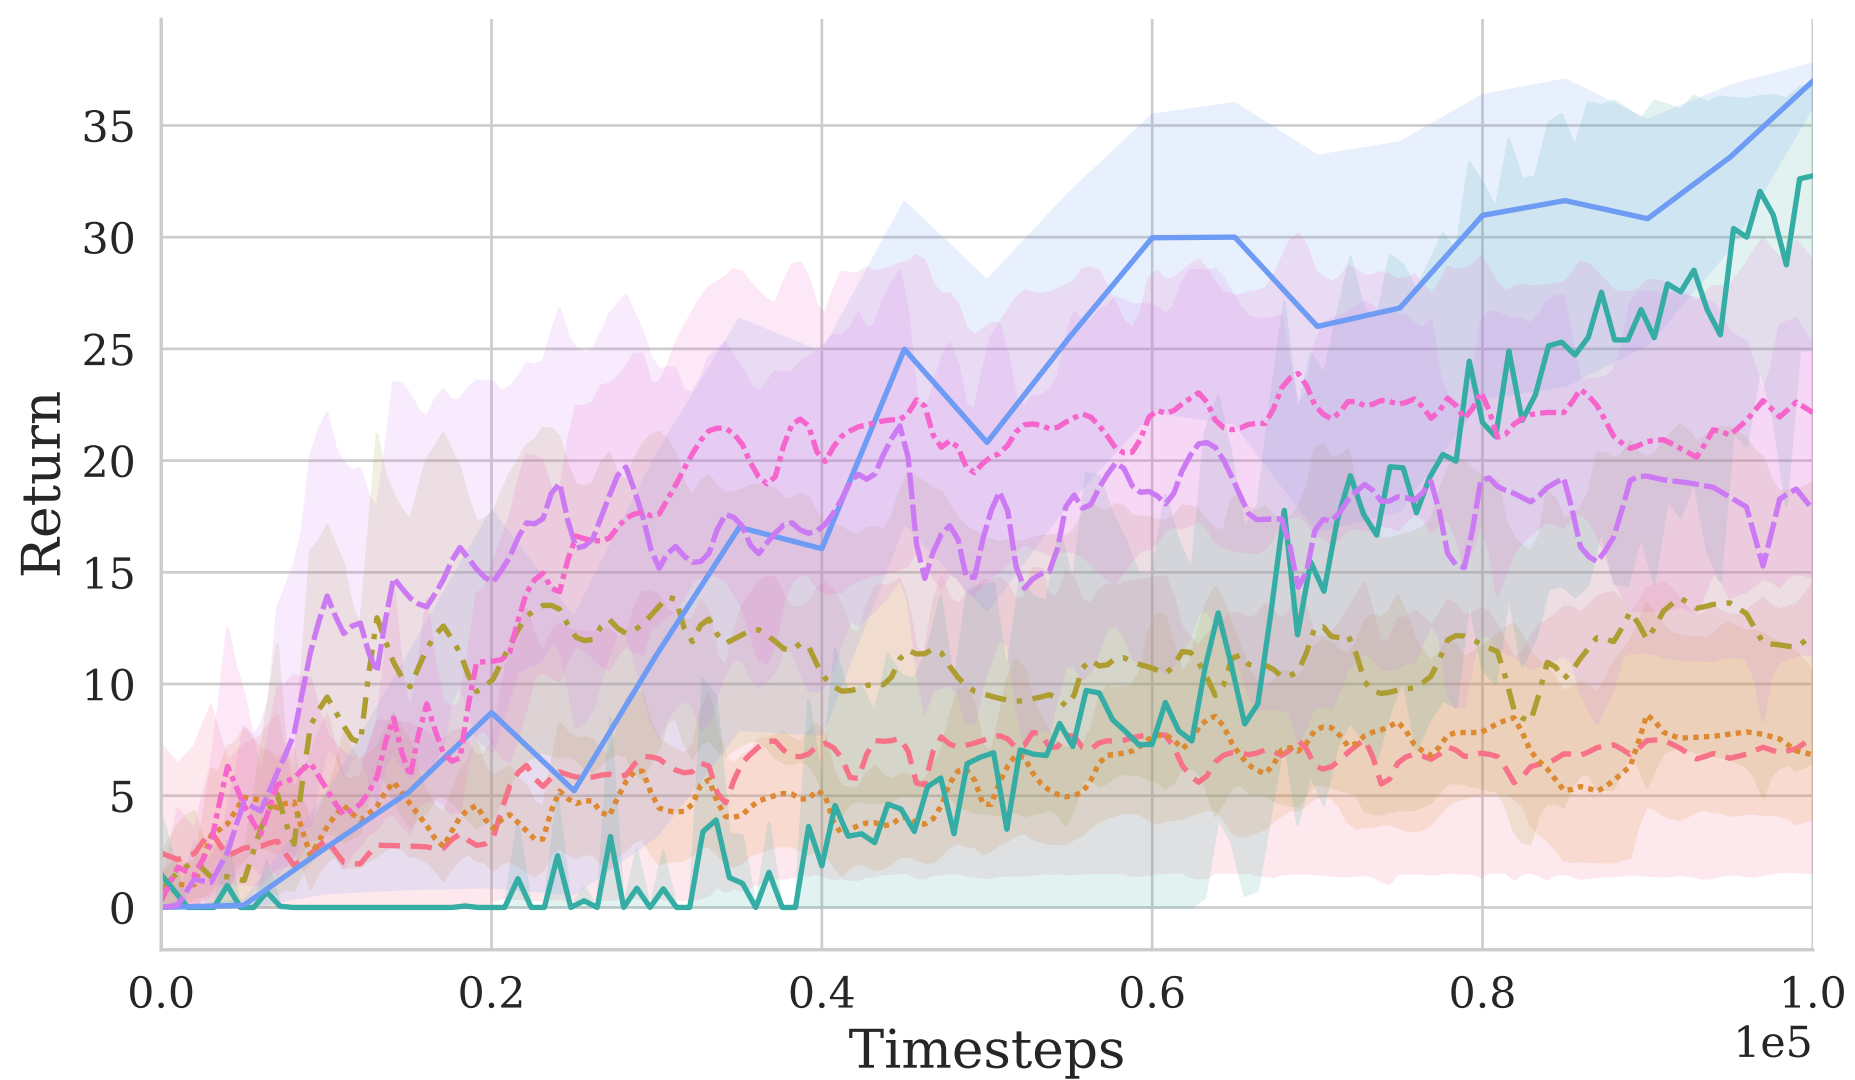

Supplement: supplementary_material [file performance_plot_rot_cw.pdf › Compression-Autoencoder/Reacher_performances/performance_plot_rot_cw.pdf]

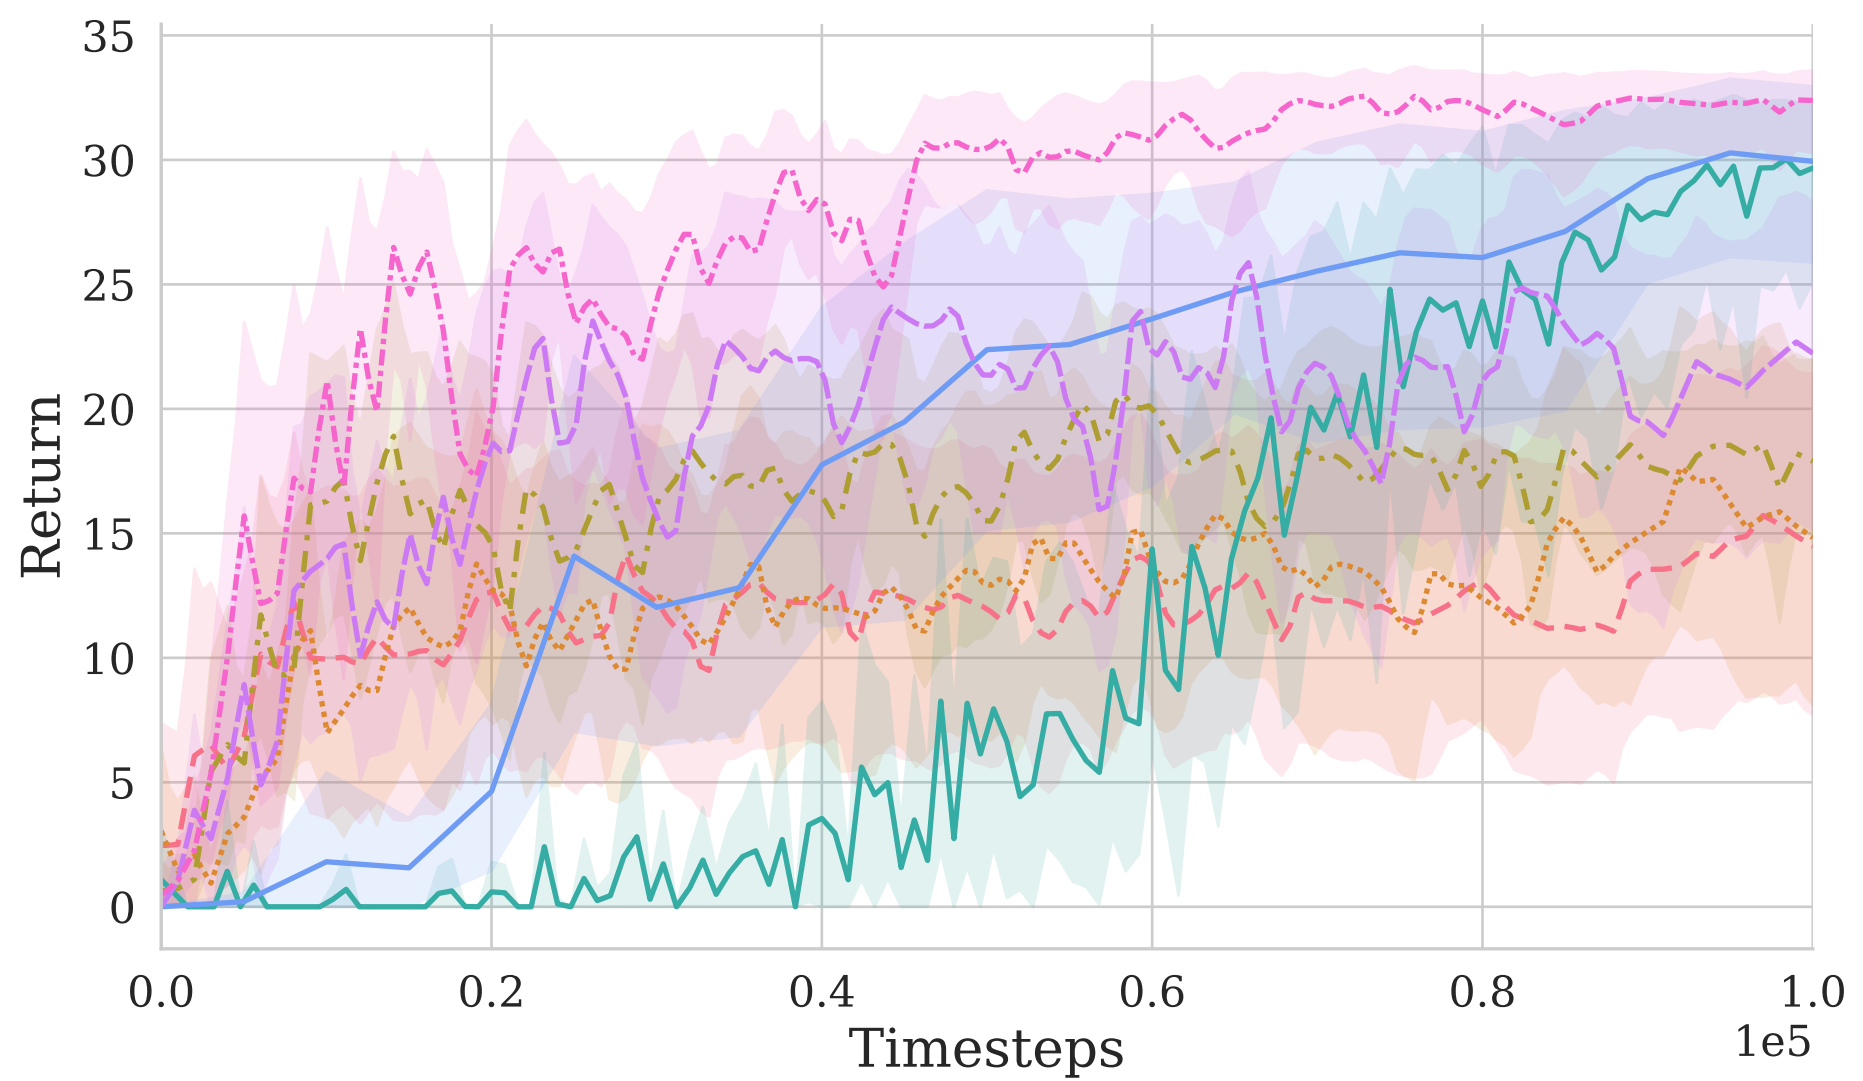

Supplement: supplementary_material [file performance_plot_speed.pdf › Compression-Autoencoder/Reacher_performances/performance_plot_speed.pdf]
